# Supplementary material for: Terpyridine-fused polyaromatic hydrocarbons generated via cyclodehydrogenation and used as ligands in Ru(ii) complexes
Source: Royal Society of Chemistry journal article supplement (doi:10.1039/c2dt30548h), 2012-01-01
Supplement: c2dt30548h.pdf [file c2dt30548h.pdf]

## **Supporting Information**

### **Terpyridine-fused Polyaromatic Hydrocarbons generated via Cyclodehydrogenation and used as Ligands in Ru(II) Complexes**

Angelika Graczyk,<sup>1</sup> Frances A. Murphy,<sup>1</sup> Deanne Nolan, Vanesa Fernández-Moreira, Natasha J. Lundin, Christopher M. Fitchett and Sylvia M. Draper\*

School of Chemistry, University of Dublin, Trinity College, Dublin 2, Ireland.

\*Email: [smdraper@tcd.ie](mailto:smdraper@tcd.ie)

#### **Contents:**

**Table S1.** Crystal Data and Structure Refinement Details for **1**.

**Table S2.** Crystal Data and Structure Refinement Details for **2**.

**Figure S1.** ORTEP Diagram showing molecular structure of **1**.

**Figure S2.** ORTEP Diagram showing molecular structure of **2**.

**Figure S3.** <sup>1</sup>H NMR spectrum of **4** (CDCl<sub>3</sub>).

**Figure S4.** The experimental (+)-MALDI-TOF spectra of **4** (lower spectrum) and the simulated isotopic distribution pattern for (M<sup>+</sup>) (DCTB matrix, upper spectrum).

#### **Additional <sup>1</sup>H NMR Spectra:**

**Figure S5.** <sup>1</sup>H NMR spectrum of **3** (CDCl<sub>3</sub>).

**Figure S6.** <sup>1</sup>H NMR spectrum of **6**(CD<sub>3</sub>CN).

**Figure S7.** <sup>1</sup>H NMR spectrum of **8**(CD<sub>3</sub>CN).

**Table S1.** Crystal Data and Structure Refinement Details for 1-(2,2':6',2''-terpyrid-4'-yl)-2,3,4,5,6-pentaphenylbenzene (**1**).

| 1.3CHCl <sub>3</sub>              |                                                                                                    |
|-----------------------------------|----------------------------------------------------------------------------------------------------|
| Empirical formula                 | C <sub>54</sub> H <sub>38</sub> Cl <sub>9</sub> N <sub>3</sub>                                     |
| Formula weight                    | 1047.92                                                                                            |
| Temperature                       | 153(2) K                                                                                           |
| Wavelength                        | 0.71073 Å                                                                                          |
| Crystal system                    | Monoclinic                                                                                         |
| Space group                       | P2(1)/n                                                                                            |
| Unit cell dimensions              | a = 11.5279(5) Å      α = 90<br>b = 17.3151(8) Å      β = 95.0820<br>c = 25.3288(12) Å      γ = 90 |
| Volume                            | 5035.9(4) Å <sup>3</sup>                                                                           |
| Z                                 | 4                                                                                                  |
| Density (calculated)              | 1.382 g/cm <sup>3</sup>                                                                            |
| Absorption coefficient            | 0.541 mm <sup>-1</sup>                                                                             |
| F(000)                            | 2144                                                                                               |
| Crystal size                      | 0.39 x 0.38 x 0.27 mm <sup>3</sup>                                                                 |
| Theta range for data collection   | 1.61 to 26.50°.                                                                                    |
| Index ranges                      | -14 ≤ h ≤ 14, -21 ≤ k ≤ 21, -31 ≤ l ≤ 29                                                           |
| Reflections collected             | 44768                                                                                              |
| Independent reflections           | 10440 [R(int) = 0.0285]                                                                            |
| Completeness to theta = 26.50°    | 100.0 %                                                                                            |
| Absorption correction             | Semi-empirical from equivalents                                                                    |
| Max. and min. transmission        | 0.8678 and 0.8169                                                                                  |
| Refinement method                 | Full-matrix least-squares on F <sup>2</sup>                                                        |
| Data / restraints / parameters    | 10440 / 0 / 595                                                                                    |
| Goodness-of-fit on F <sup>2</sup> | 1.035                                                                                              |
| R <sub>1</sub> [I > σ(I)]         | 0.0595                                                                                             |
| wR <sub>2</sub> (all data)        | 0.1707                                                                                             |

<sup>a</sup> R<sub>1</sub> = Σ(|F<sub>o</sub>| - |F<sub>c</sub>|)/Σ|F<sub>o</sub>|; wR<sub>2</sub> = [Σw(F<sub>o</sub><sup>2</sup> - F<sub>c</sub><sup>2</sup>)<sup>2</sup>/ΣwF<sub>o</sub><sup>2</sup>]<sup>1/2</sup>; goodness of fit = {Σ[w(F<sub>o</sub><sup>2</sup> - F<sub>c</sub><sup>2</sup>)<sup>2</sup>/(N<sub>obs</sub> - N<sub>param</sub>)]<sup>1/2</sup>; w = [σ<sup>2</sup>(F<sub>o</sub><sup>2</sup>) + (g<sub>1</sub>P)<sup>2</sup> + g<sub>2</sub>P]<sup>-1</sup>; P = [max(F<sub>o</sub><sup>2</sup>; 0) + 2F<sub>c</sub><sup>2</sup>]/3.

**Table S2.** Crystal Data and Structure Refinement Details for 1-(2,2':6',2''-terpyrid-4'-yl)-2,3,4,5,6-penta-(4-*tert*-butylphenyl)benzene (**2**).

|                                 | 2.2CH <sub>2</sub> Cl <sub>2</sub>          |             |
|---------------------------------|---------------------------------------------|-------------|
| Empirical formula               | C73 H79 Cl4 N3                              |             |
| Formula weight                  | 1140.19                                     |             |
| Temperature                     | 153(2) K                                    |             |
| Wavelength                      | 0.71073 Å                                   |             |
| Crystal system                  | Triclinic                                   |             |
| Space group                     | P-1                                         |             |
| Unit cell dimensions            | a = 12.2579(7) Å                            | α = 66.3110 |
|                                 | b = 16.5216(9) Å                            | β = 70.3760 |
|                                 | c = 18.2312(10) Å                           | γ = 76.7660 |
| Volume                          | 3165.7(3) Å <sup>3</sup>                    |             |
| Z                               | 2                                           |             |
| Density (calculated)            | 1.196 g/cm <sup>3</sup>                     |             |
| Absorption coefficient          | 0.231 mm <sup>-1</sup>                      |             |
| F(000)                          | 1212                                        |             |
| Crystal size                    | 0.45 x 0.37 x 0.20 mm <sup>3</sup>          |             |
| Theta range for data collection | 1.77 to 26.00°.                             |             |
| Index ranges                    | -15 ≤ h ≤ 15, -20 ≤ k ≤ 20, -22 ≤ l ≤ 22    |             |
| Reflections collected           | 31713                                       |             |
| Independent reflections         | 12437 [R(int) = 0.0297]                     |             |
| Completeness to theta = 26.00°  | 99.9 %                                      |             |
| Absorption correction           | Semi-empirical from equivalents             |             |
| Max. and min. transmission      | 1.0000 and 0.7814                           |             |
| Refinement method               | Full-matrix least-squares on F <sup>2</sup> |             |
| Data / restraints / parameters  | 12437 / 0 / 721                             |             |
| Goodness of fit on F2           | 1.076                                       |             |
| R <sub>1</sub> [I > σ(I)]       | 0.0801                                      |             |
| wR <sub>2</sub> (all data)      | 0.2070                                      |             |

<sup>a</sup> R<sub>1</sub> = Σ(|F<sub>o</sub>| - |F<sub>c</sub>|)/Σ|F<sub>o</sub>|; wR<sub>2</sub> = [Σw(F<sub>o</sub><sup>2</sup> - F<sub>c</sub><sup>2</sup>)<sup>2</sup>/ΣwF<sub>o</sub><sup>2</sup>]<sup>1/2</sup>; goodness of fit = {Σ[w(F<sub>o</sub><sup>2</sup> - F<sub>c</sub><sup>2</sup>)<sup>2</sup>]/(N<sub>obs</sub> - N<sub>param</sub>)<sup>1/2</sup>; w = [σ<sup>2</sup>(F<sub>o</sub><sup>2</sup>) + (g<sub>1</sub>P)<sup>2</sup> + g<sub>2</sub>P]<sup>-1</sup>; P = [max(F<sub>o</sub><sup>2</sup>; 0) + 2F<sub>c</sub><sup>2</sup>]/3.

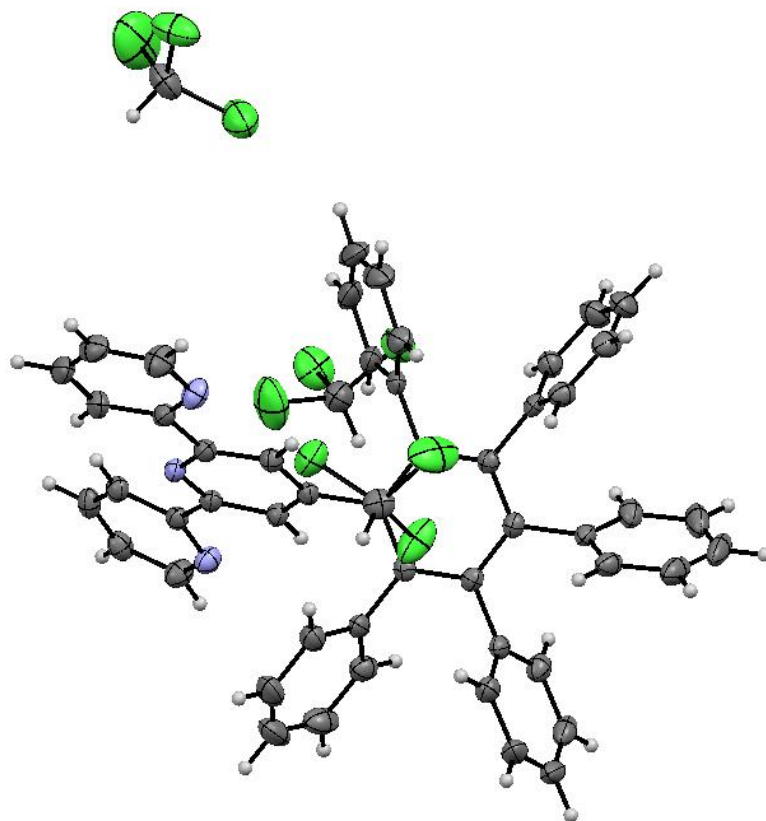

**Figure S1.** ORTEP diagram showing molecular structure of 1-(2,2':6',2''-Terpyrid-4'-yl)-2,3,4,5,6-pentaphenylbenzene (**1**). Ellipsoids are drawn at 50% probability level.

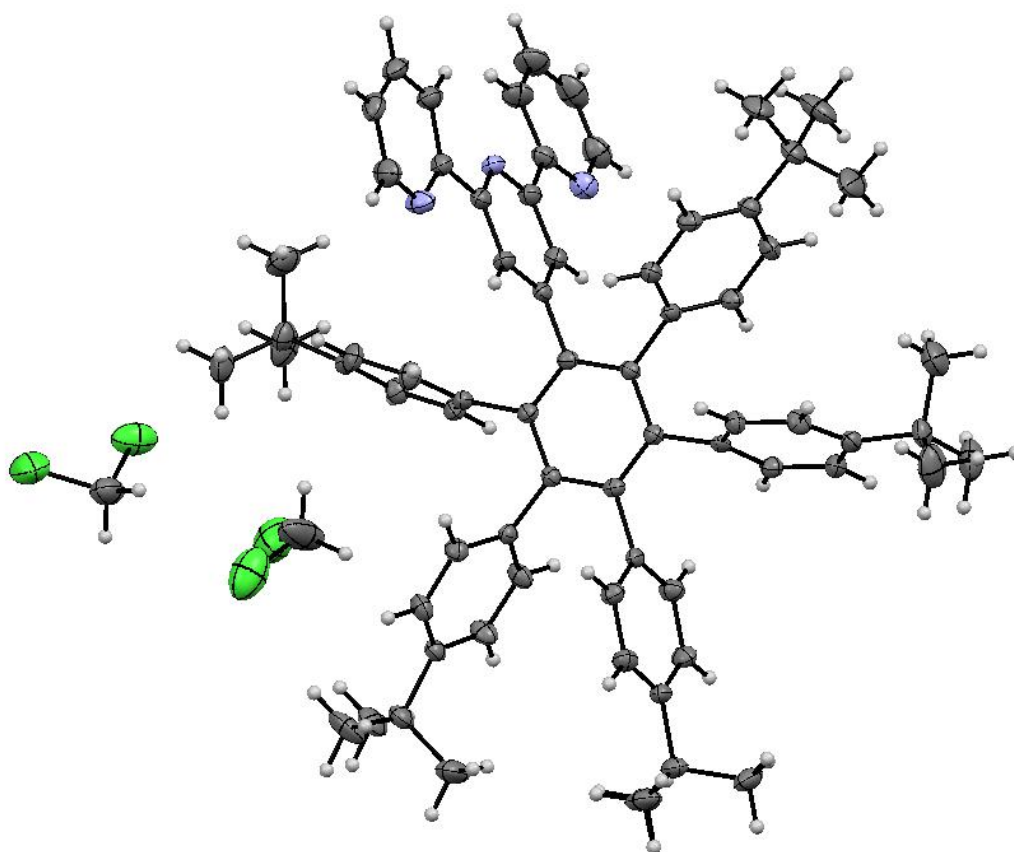

**Figure S2.** ORTEP diagram showing molecular structure of 1-(2,2':6',2''-Terpyrid-4'-yl)-2,3,4,5,6-penta-(4-*tert*-butylphenyl)benzene (**2**). Ellipsoids are drawn at 50% probability level.

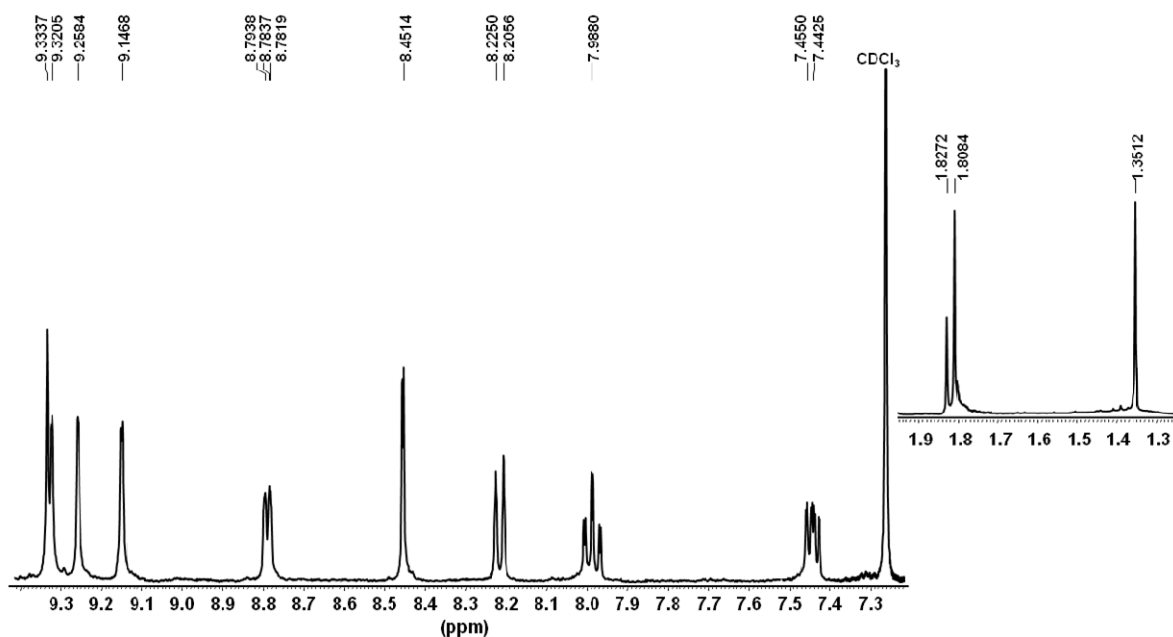

**Figure S3.** <sup>1</sup>H NMR Spectrum of **4** (CDCl<sub>3</sub>) showing the aromatic region with inset portion of aliphatic region.

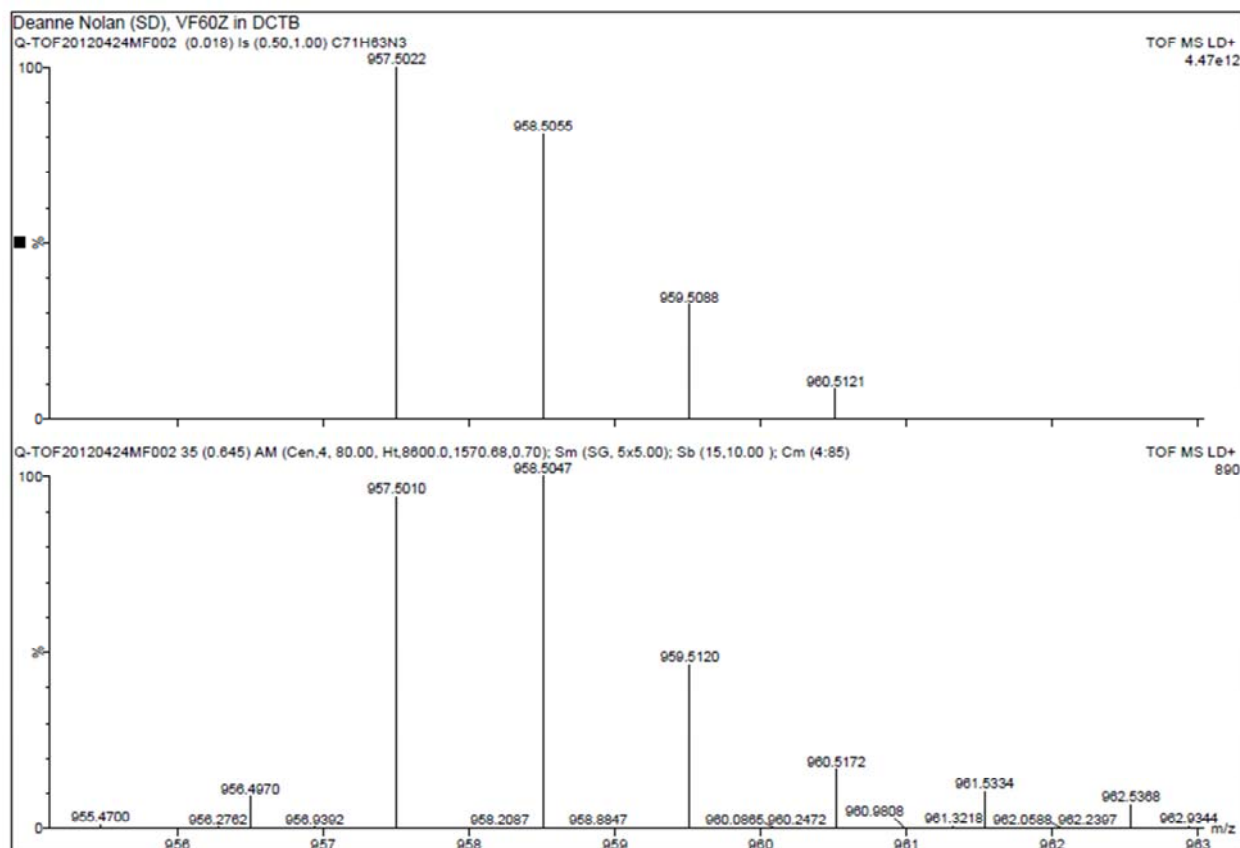

**Figure S4.** The experimental (+)-MALDI-TOF spectra of **4** (lower spectrum) and the simulated isotopic distribution pattern for (M<sup>+</sup>) (DCTB matrix, upper spectrum).

### Additional $^1\text{H}$ NMR Spectra:

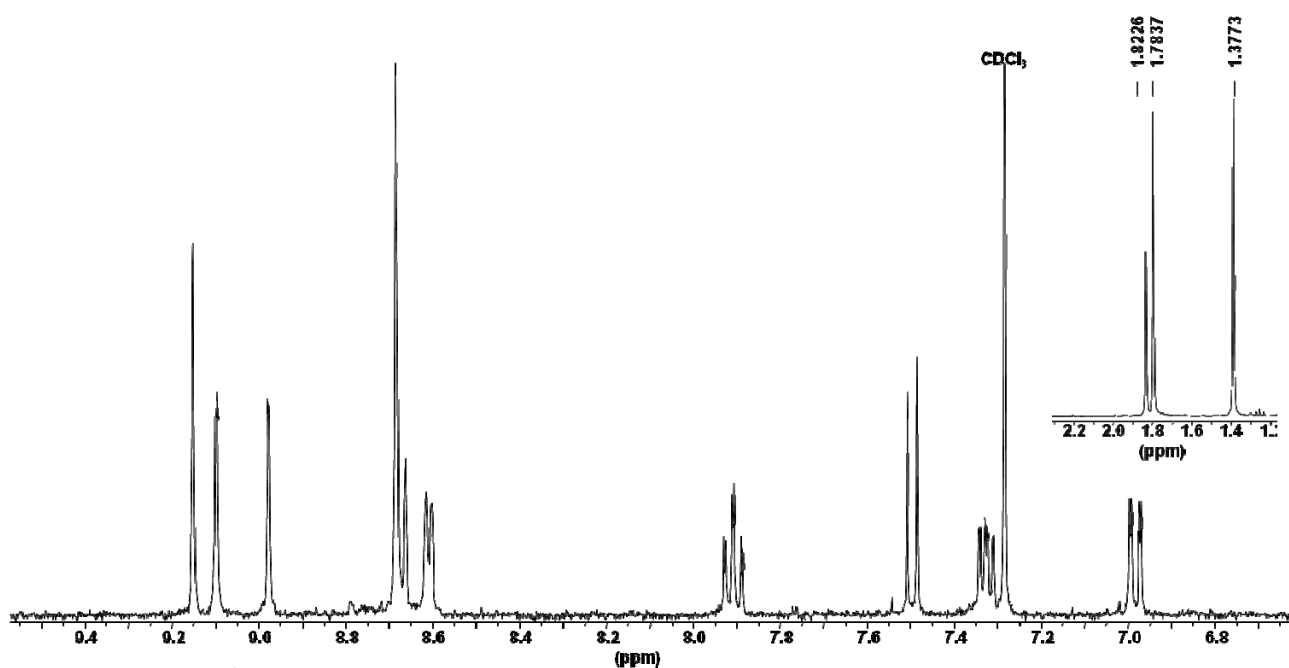

**Figure S5.**  $^1\text{H}$  NMR Spectrum of **3** ( $\text{CDCl}_3$ ) showing the aromatic region with inset portion of aliphatic region.

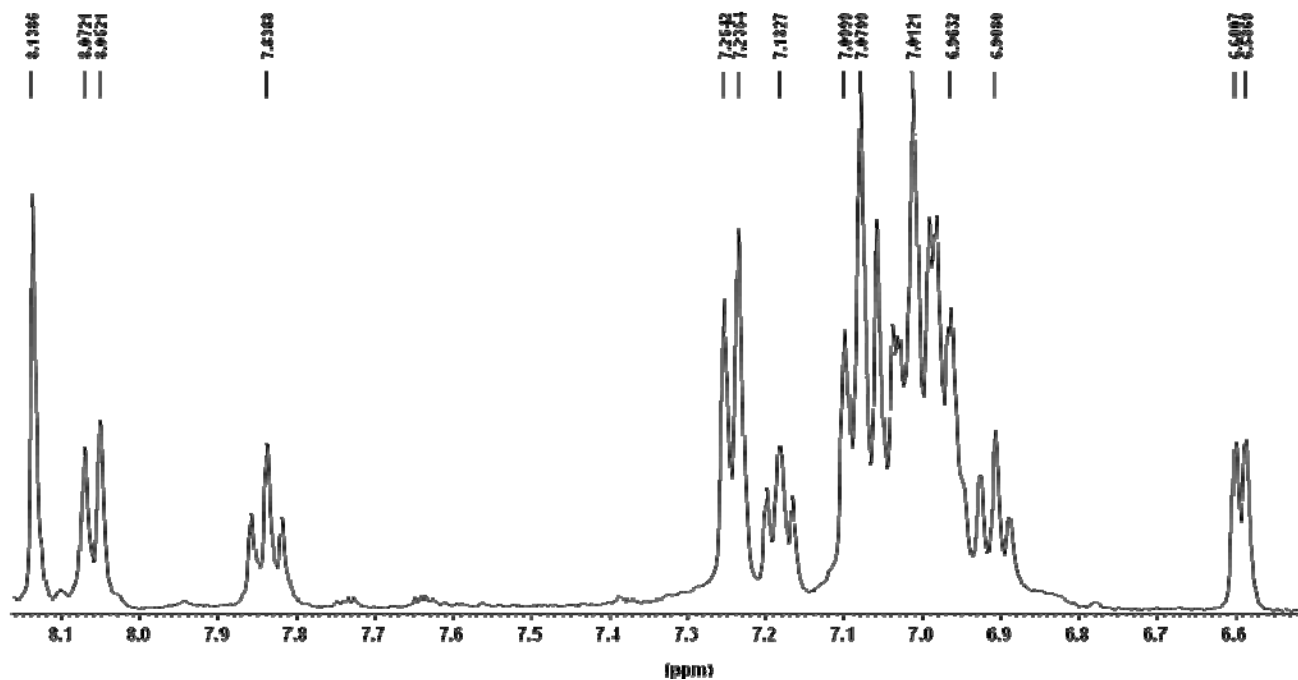

**Figure S6.**  $^1\text{H}$  NMR Spectrum of **6** ( $\text{CD}_3\text{CN}$ ) showing the aromatic region.

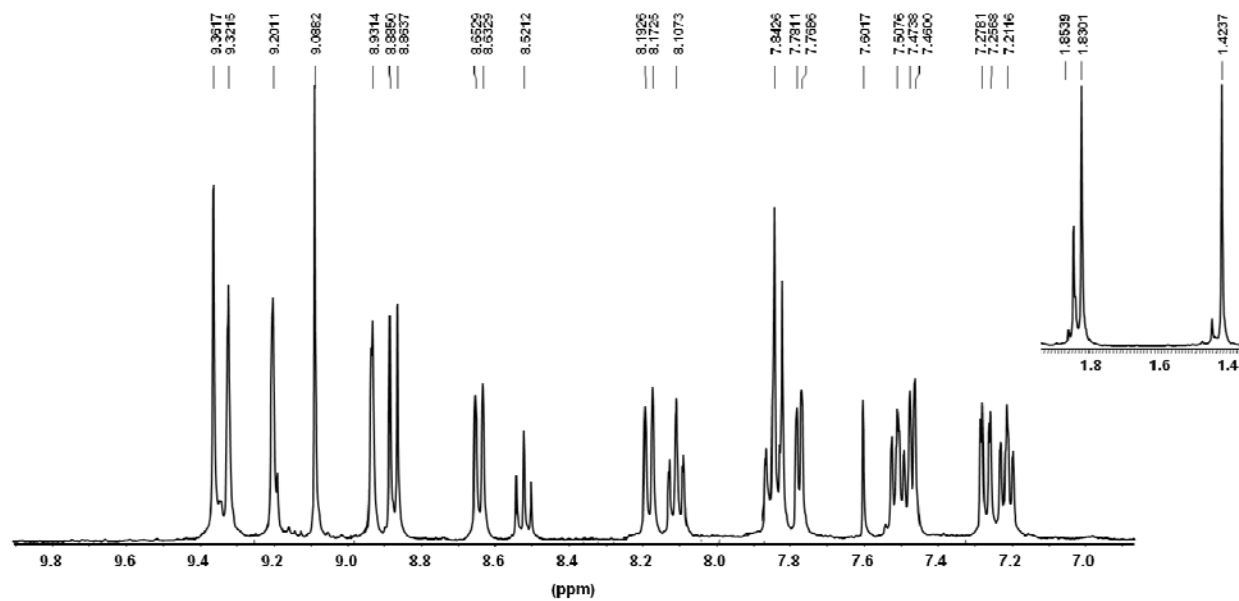

**Figure S7.**  $^1\text{H}$  NMR Spectrum of **8** ( $\text{CD}_3\text{CN}$ ) showing the aromatic region with inset portion of aliphatic region.
